# Supplementary material for: Association between platelet-to-lymphocyte ratio and chronic obstructive pulmonary disease：findings based on NHANES 1999–2018
Source: Research Square preprint supplement (doi:10.21203/rs.3.rs-6906240/v1), 2025-08-05
Supplement: Supplementary file 1 [file 25d25e4fcc077c8bab7ed74b.xlsx]

## Sheet: report
Variable name	Variable annotation	Total sample size	Missing sample size	Missing ratio
PIR		22679	1958	0.08634
BMI		22679	343	0.01512
DIABETES		22679	279	0.0123
MARITAL.STATUS		22679	189	0.00833
AST		22679	100	0.00441
ALT		22679	90	0.00397
SMOKING.STATUS		22679	22	0.00097
STROKE		22679	22	0.00097
HBP		22679	4	0.00018
HD		22679	3	0.00013
EDUCATIONAL.LEVEL		22679	1	4e-05
SEQN		22679	0	0
GENDER		22679	0	0
AGE		22679	0	0
RACE		22679	0	0
ALQ		22679	0	0
CANCER		22679	0	0
TC		22679	0	0
TG		22679	0	0
LDL		22679	0	0
PLR		22679	0	0
COPD		22679	0	0
