# Supplementary material for: Association between platelet-to-lymphocyte ratio and chronic obstructive pulmonary disease：findings based on NHANES 1999–2018
Source: Research Square preprint supplement (doi:10.21203/rs.3.rs-6906240/v1), 2025-08-05
Supplement: Supplementary file 2 [file 34b891cd321f9fb72889114d.xlsx]

## Sheet: Sheet1
TABLE 1 Characteristics of the study participants according to PLR index.
Characteristic	Total (n = 22679)	Q1(n＝5617）	Q2(n＝5717）	Q3(n＝5669）	Q4(n＝5676）	P value
Age(years)	49.88±18.16	49.36±18.26	48.67±17.63	49.08±17.94	52.41±18.26	＜0.001
Gender %						＜0.001
Female	11822（52.13）	2458（43.76）	2860（50.03）	3109（54.84）	3395（59.81）
Male	10857（47.87）	3159（56.24）	2857（49.97）	2560（45.16）	2281（40.19）
Ethnicity %						＜0.001
Mexican American	3997（17.62）	1034（18.41）	1041（18.21）	1033（18.22）	889（15.66）
Other Hispanic	1924（8.48）	519（9.24）	532（9.31）	477（8.41）	396（6.98）
Non-Hispanic White	10153（44.77）	2145（38.19）	2489（43.54）	2668（47.06）	2851（50.23）
Non-Hispanic Black	4501（19.85）	1292（23）	1070（18.72）	1007（17.76）	1132（19.94）
Other Race	2104（9.28）	627（11.16）	585（10.23）	484（8.54）	408（7.19）
Education %						＜0.001
Below high school	6113（26.95）	1711（30.46）	1529（26.74）	1484（26.18）	1389（24.47）
High school	5173（22.81）	1308（23.29）	1324（23.16）	1264（22.3）	1277（22.5）
Above high school	11393（50.24）	2598（46.25）	2864（50.1）	2921（51.53）	3010（53.03）
Marital status %						＜0.001
Married/living with partner	13888（61.24）	3349（59.62）	3629（63.48）	3560（62.8）	3350（59.02）
Widowed/divorced/separated	4972（21.92）	1245（22.16）	1137（19.89）	1160（20.46）	1430（25.19）
Never married	3819（16.84）	1023（18.21）	951（16.63）	949（16.74）	896（15.79）
Smoking status %						＜0.001
Never	12314（54.29）	2751（48.98）	3089（54.03）	3254（57.4）	3220（56.73）
Former	4635（20.44）	1320（23.5）	1400（24.49）	1403（24.75）	849（14.96）
Now	5730（25.27）	1546（27.52）	1228（21.48）	1012（17.85）	1607（28.31）
Drinking status %						＜0.001
≥12 drinks/year	10802（47.63）	2810（50.03）	2789（48.78）	2688（47.42）	2515（44.31）
＜12 drinks/year	4458（19.66）	1083（19.28）	1118（19.56）	1065（18.79）	1192（21）
Not recorded	7419（32.71）	1724（30.69）	1810（31.66）	1916（33.8）	1969（34.69）
Diabetes %						＜0.001
No	18813（82.95）	4464（79.47）	4690（82.04）	4841（85.39）	4818（84.88）
Yes	3866（17.05）	1153（20.53）	1027（17.96）	828（14.61）	858（15.12）
Hypertension %						＜0.001
No	13183（58.13）	3156（56.19）	3466（60.63）	3390（59.8）	3171（55.87）
Yes	9496（41.87）	2461（43.81）	2251（39.37）	2279（40.2）	2505（44.13）
Cancer %						＜0.001
No	20606（90.86）	5157（92.13）	5258（91.97）	5177（91.32）	4996（88.02）
Yes	2073（9.14）	442（7.87）	459（8.03）	492（8.68）	680（11.98）
Heart disease %						＜0.001
No	20692（91.24）	5045（89.82）	5251（91.85）	5242（92.47）	5154（90.8）
Yes	1987（8.76）	572（10.18）	466（8.15）	427（7.53）	522（9.2）
Stroke %						0.16
No	21831（96.26）	5395（96.05）	5512（96.41）	5479（96.65）	5445（95.93）
Yes	848（3.74）	222（3.95）	205（3.59）	190（3.35）	231（4.07）
COPD %						＜0.001
No	21706（95.71）	5373（95.66）	5500（96.2）	5454（96.21）	5379（94.77）
Yes	973（4.29）	244（4.34）	217（3.8）	215（3.79）	297（5.23）
PIR	2.54±1.62	2.33±1.56	2.56±1.62	2.6±1.64	2.66±1.63	＜0.001
BMI	28.88±6.81	29.21±6.75	29.1±6.95	28.89±6.83	28.33±6.67	＜0.001
ALT	25.04±26.87	27.12±21.17	25.27±18.19	24.36±31.21	23.42±33.57	＜0.001
AST	25.22±22.18	26.63±17.04	24.91±16.4	24.27±16.94	25.11±33.45	＜0.001
TC	193.99±41.04	190.01±41.47	193.27±40.21	195.83±40.44	196.82±41.71	＜0.001
TG	122.79±67.84	128.82±71.17	125.51±68.61	120.77±66.6	116.11±64.17	＜0.001
LDL	115.32±35.85	112.8±36.29	115.08±35.16	116.88±35.33	116.48±36.49	＜0.001
Data are expressed as weighted means ± SD or percentages (%). PLR：Platelet-to-lymphocyte ratio；PIR：poverty-to-income ratio;BMI:Body Mass index；COPD：Chronicobstructive pulmonary disease；ALT: Alanine aminotransferase；AST：Aspartate Aminortransferase；TC：Total Cost；TG：Triglyceride；LDL：Low Density Lipoprotein.
