# Supplementary material for: Association between platelet-to-lymphocyte ratio and chronic obstructive pulmonary disease：findings based on NHANES 1999–2018
Source: Research Square preprint supplement (doi:10.21203/rs.3.rs-6906240/v1), 2025-08-05
Supplement: Supplementary file 3 [file 992fd9d6dcd9f895e1d2d007.xlsx]

## Sheet: Sheet1
Table 2 Multiple linear association analysis of PLR index and COPD
PLR-COPD	Model 1	Model 2	Model 3
Continuous (per SD)	1.003（1.002，1.004）＜0.00001	1.001（1，1.002）0.02559	1.002（1.001，1.003）0.00009
Categories
Q1	Reference	Reference	Reference
Q2	0.869(0.721,1.047) 0.13987	0.88(0.728,1.066) 0.19086	0.992（0.815，1.206） 0.93467
Q3	0.868(0.72,1.047) 0.13842	0.847(0.699,1.026) 0.08925	1.018（0.835，1.241） 0.8582
Q4	1.216(1.022,1.446) 0.02726	1.018(0.85,1.218) 0.8497	1.249（1.036，1.506） 0.02003
p for trend	＜0.00001	0.02559	9e-05
The data were expressed as the β coefficient (95%CI). Model 1 has not been adjusted; Model 2 adjusted for gender, age and race; Model 3 includes additional adjustments for gender, age, race, marital status, education, poverty income ratio,BMI, smoking status, drinking status, hypertension, diabetes, heart diseases,stroke, cancer, ALT,AST,TC,TG and LDL.
