# Supplementary material for: Association between platelet-to-lymphocyte ratio and chronic obstructive pulmonary disease：findings based on NHANES 1999–2018
Source: Research Square preprint supplement (doi:10.21203/rs.3.rs-6906240/v1), 2025-08-05
Supplement: Supplementary file 4 [file d9a37dcf00058babb1328c3c.xlsx]

## Sheet: Sheet1
Table 3 Subgroup analysis and interaction effect tests for the association between PLR and COPD prevalence
PLR	N	OR(95％CI）	P value	P for interaction
Gender				0.3594
Female	10857	1.0015(1.0001,1.0029)	0.0358
Male	11822	1.0028(1.0012,1.0043)	0.0005
Race				0.0159
Mexican American	3397	1.0063(1.0025,1.0102)	0.0014
Other Hispanic	1924	1.0046(1.0001,1.0092)	0.0442
Non-Hispanic White	10153	1.0016(1.0004,1.0029)	0.0019
Non-Hispanic Black	4501	1.0002(0.9975,1.0030)	0.8652
Other Race	2104	1.0079(1.0029,1.0128)	0.0018
Education				0.8942
Below high school	6113	1.0018(0.9999,1.0037)	0.0616
High school	5173	1.0019(0.9999,1.0039)	0.061
Above high school	11393	1.0023(1.0007,1.0040)	0.004
Marital status				0.4474
Married/living with partner	13888	1.0015(1.0001,1.0029)	0.0344
Widowed/divorced/separated	3819	1.0029(0.9990,1.0067)	0.1426
Never married	4972	1.0026(1.0009,1.0043)	0.0026
Drinking status				0.876
≥12 drinks/year	10802	1.0019(1.0005,1.0033)	0.0081
＜12 drinks/year	4458	1.0033(1.0009,1.0057)	0.0062
Not recorded	7419	1.0015(0.9994,1.0035)	0.1693
Smoking status				0.0495
Never	10802	1.0026(1.0004,1.0048)	0.0193
Former	4635	0.9988(0.9966,1.0010)	0.2942
Now	5730	1.0030(1.0016,1.0043)	＜0.0001
Diabetes				0.5789
No	18813	1.0021(1.0009,1.0034)	0.0006
Yes	3866	1.0018(0.9999,1.0037)	0.0694
Hypertension				0.8241
No	13183	1.0021(1.0002,1.0040)	0.0279
Yes	9496	1.0022(1.0009,1.0034)	0.0006
Heart disease				0.3448
No	20692	1.0021(1.0009,1.0033)	0.0008
Yes	1987	1.0020(1.0001,1.0040)	0.0353
Stroke				0.883
No	21831	1.0020(1.0009,1.0031)	0.0005
Yes	848	1.0021(0.9994,1.0049)	0.1269
Cancer				0.7471
No	20606	1.0021(1.0009,1.0032)	0.0006
Yes	2073	1.0021(0.9999,1.0043)	0.0588
COPD, chronic obstructive pulmonary disease, OR, odds ratio, PIR, poverty income ratio, BMI, body mass index
